# Supplementary material
Source: PubMed Central journal article supplement (PMC3220516)
Supplement: supp_M111.232918_jbc.M111.232918-1.pdf [file supp_M111.232918_jbc.M111.232918-1.pdf]

**INHIBITION OF GLUCONEOGENIC GENES BY CALCIUM-REGULATED HEAT-STABLE  
PROTEIN-1 VIA REPRESSION OF PPAR $\alpha$**

Yanbo Fan, Yanhong Guo, Milton Hamblin, Lin Chang, Jifeng Zhang, and Y. Eugene Chen

**Supplemental Table 1**

| Genes             | Primer sequence<br>(Forward) | Primer sequence<br>(Reverse) |
|-------------------|------------------------------|------------------------------|
| Mouse G6Pc        | tccccagaattctccactg          | aacatcggagtgaccttgg          |
| Mouse PEPCK1      | gtcaacaccgacctccctta         | ccctagcctgttctctgtgc         |
| Mouse CARHSP1     | ctcttgaggccaaggaacag         | agggctcactagcaggtaa          |
| Human G6Pc        | tgccagctagccaactcct          | aaaattagcctggcatggtg         |
| Human PEPCK1      | gcttttcagcatctccaagg         | gaacacttgcctctcttgc          |
| Human G6Pc CHIP   | ttgcactgccaagaagcatg         | ccttgcccctgttttatatg         |
| Human PEPCK1 CHIP | ttgccaagttagggtgcat          | gtttgacacaactccaac           |
| Mouse G6Pc CHIP   | tattggagacactgttggt          | caaaggaagtttgcactg           |
| Mouse PEPCK1 CHIP | aaaatgtgcagccagcaacatgga     | tgtaataatgttggaggcctca       |

**Table S1. Primers used for real-time PCR.**
